# Supplementary material for: Nasal Mucosa Exploited by SARS-CoV-2 for Replicating and Shedding during Reinfection
Source: MDPI journal article supplement (doi:10.3390/v14081608), 2022-07-23
Supplement: s1 [file viruses-1792481-supplementary.pdf › viruses-1792481-supplementary.pdf]

# Nasal mucosa exploited by SARS-COV-2 for replicating and shedding during reinfection

Heng Li<sup>a #</sup>, Xin Zhao<sup>a #</sup>, Jing Li<sup>a #</sup>, Huiwen Zheng<sup>a #</sup>, Yurong Zhao<sup>a</sup>, Jinling Yang<sup>a</sup>,  
Jingxian Zhou<sup>a</sup>, Fengmei Yang<sup>a</sup>, YanliChen<sup>a</sup>, Yuanyuan Zuo<sup>a</sup>, Qingrun Lai<sup>a</sup>, Haiting  
Long<sup>a</sup>, Yanyan Li<sup>a</sup>, Weihua Jin<sup>a</sup>, Haijing Shi<sup>a</sup>, Longding Liu<sup>a \*</sup>

<sup>a</sup> Institute of Medical Biology, Chinese Academy of Medical Sciences & Peking  
Union Medical College, Kunming 650118, China

<sup>#</sup>These authors contributed equally to this work.

<sup>\*</sup>Corresponding author: Longding Liu, E-mail: longdingl@gmail.com.

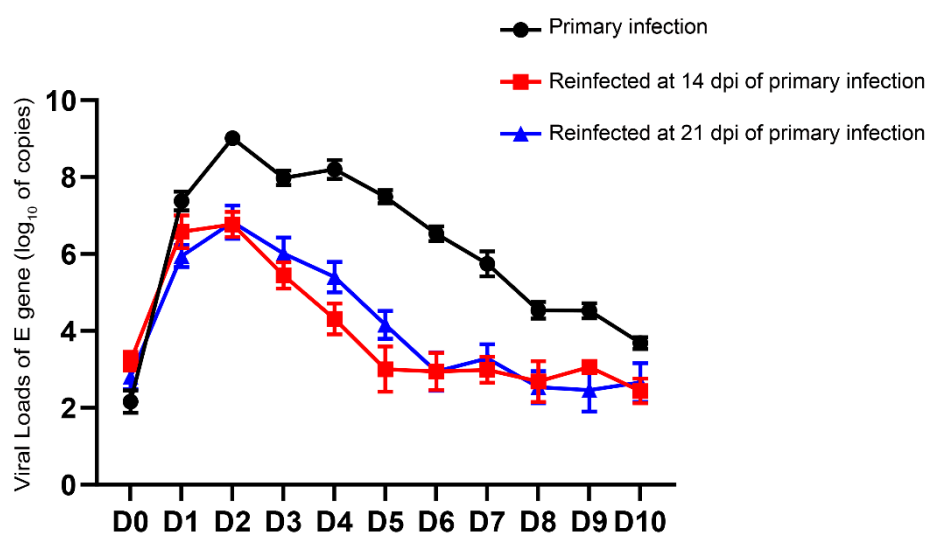

**Figure S1.** Viral shedding in 1 ml nasal washes from 0 dpi to 10 dpi in the primary infection and re-infection.

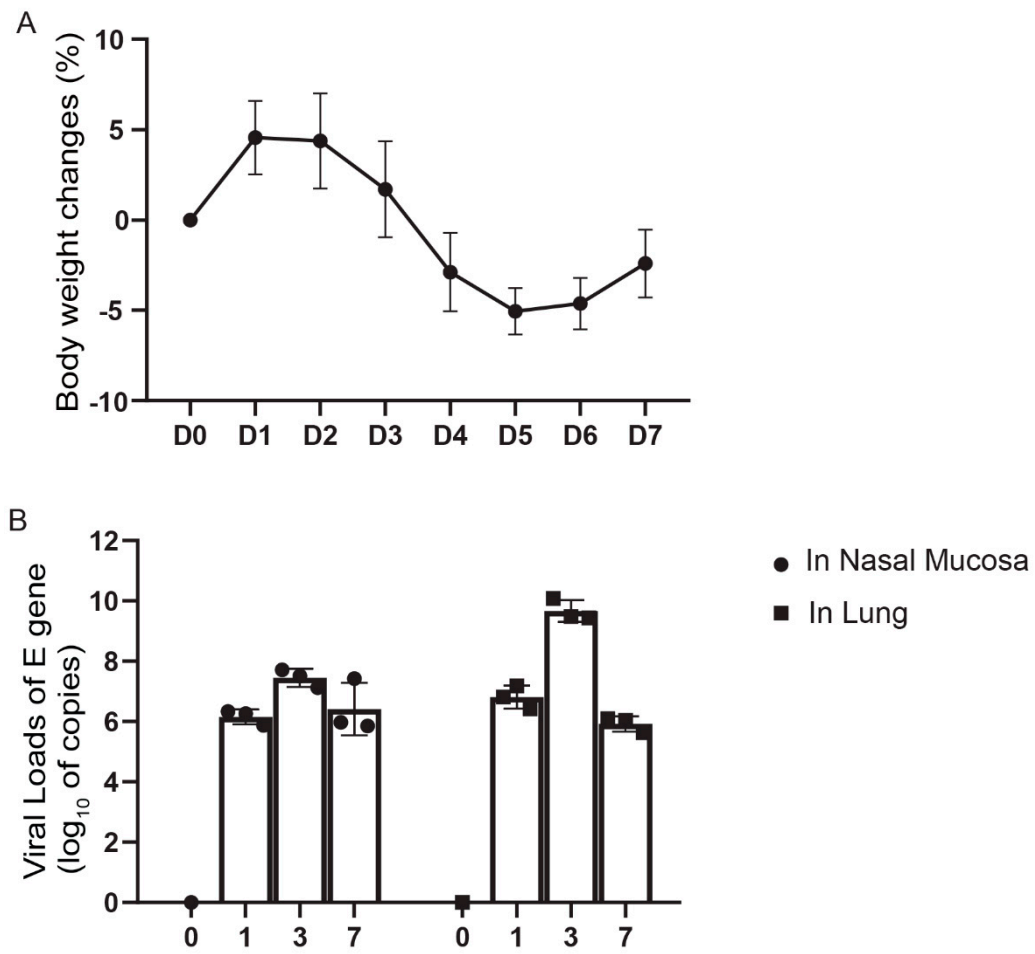

**Figure S2.** The infectivity in healthy Syrian hamsters of the shedding from upper respiratory tract in the primary infection and reinfection.

|                       |                                                                                                             |      |
|-----------------------|-------------------------------------------------------------------------------------------------------------|------|
| Primary infection     | TTGTTTGTTCCTTCTGTTTATTGCCACTAGTCTCTAGTCAGTGTGTTAATCTTACAACCGAAGCTCAATTACCCCTGCATACACTAATTCCTTTCACAC         | 100  |
| Reinfection at 14 dpi | TTGTTTGTTCCTTCTGTTTATTGCCACTAGTCTCTAGTCAGTGTGTTAATCTTACAACCGAAGCTCAATTACCCCTGCATACACTAATTCCTTTCACAC         | 100  |
| Reinfection at 21 dpi | TTGTTTGTTCCTTCTGTTTATTGCCACTAGTCTCTAGTCAGTGTGTTAATCTTACAACCGAAGCTCAATTACCCCTGCATACACTAATTCCTTTCACAC         | 99   |
| Consensus             | atggttggtttttctgtttttattgccaactagctctctagtcagtggttaattcttaaacacaggaactcaattaccocctgcatacactaattctcttccacac  |      |
| Primary infection     | GTGGTGTTTATTACCTGACAAAGTTTTCAGATCTCAGTTTACATCTCAACTCAGGACTGTTCCTTACCTTCTCTTTCCAAATGTACTTGGTTCATGCG          | 200  |
| Reinfection at 14 dpi | GTGGTGTTTATTACCTGACAAAGTTTTCAGATCTCAGTTTACATCTCAACTCAGGACTGTTCCTTACCTTCTCTTTCCAAATGTACTTGGTTCATGCG          | 200  |
| Reinfection at 21 dpi | GTGGTGTTTATTACCTGACAAAGTTTTCAGATCTCAGTTTACATCTCAACTCAGGACTGTTCCTTACCTTCTCTTTCCAAATGTACTTGGTTCATGCG          | 199  |
| Consensus             | gtggtgtttattaccctgacaaagttttcagatcctcagttttacatccaactcaggactgttcttacccttctcttccaatgttacttgggtccatgctc       |      |
| Primary infection     | TATACATGTCCTCGGACCAATGGTACTAAGAGGTTTGATAACCCCTGTCTACCATTTAATGATGGTGTTTATTTTGCTTCCACTGAGAAGCTCTAACATA        | 300  |
| Reinfection at 14 dpi | TATACATGTCCTCGGACCAATGGTACTAAGAGGTTTGATAACCCCTGTCTACCATTTAATGATGGTGTTTATTTTGCTTCCACTGAGAAGCTCTAACATA        | 300  |
| Reinfection at 21 dpi | TATACATGTCCTCGGACCAATGGTACTAAGAGGTTTGATAACCCCTGTCTACCATTTAATGATGGTGTTTATTTTGCTTCCACTGAGAAGCTCTAACATA        | 299  |
| Consensus             | tatacatgtctctgggaccaaagtggtactaagaggtttgataacccctgtcctaccatttaatgatggtgtttattttgtcttccactgagaaggtctaacata   |      |
| Primary infection     | ATAAGAGGCTGGATTTTGTGTACTACTTTAGATTGGAAGACCCAGTCCCTACTTATTTGTTAATAACGCTACTAATGTGTATTAAAGCTGTGAATTC           | 400  |
| Reinfection at 14 dpi | ATAAGAGGCTGGATTTTGTGTACTACTTTAGATTGGAAGACCCAGTCCCTACTTATTTGTTAATAACGCTACTAATGTGTATTAAAGCTGTGAATTC           | 400  |
| Reinfection at 21 dpi | ATAAGAGGCTGGATTTTGTGTACTACTTTAGATTGGAAGACCCAGTCCCTACTTATTTGTTAATAACGCTACTAATGTGTATTAAAGCTGTGAATTC           | 399  |
| Consensus             | ataagaggtggatttttgggtactactttagattcgaagaccagctccctacttattgttaataacgctactaatgtgtttataaagctctgtgaatttc        |      |
| Primary infection     | AAITTTGTAATGATCCATTTTGGGTGTTTATTACACAAAAACAACAAAGTTGGATGGAAGTGAGTTCAGAGTTTATCTAGTGCGAATAATTGCAC             | 500  |
| Reinfection at 14 dpi | AAITTTGTAATGATCCATTTTGGGTGTTTATTACACAAAAACAACAAAGTTGGATGGAAGTGAGTTCAGAGTTTATCTAGTGCGAATAATTGCAC             | 500  |
| Reinfection at 21 dpi | AAITTTGTAATGATCCATTTTGGGTGTTTATTACACAAAAACAACAAAGTTGGATGGAAGTGAGTTCAGAGTTTATCTAGTGCGAATAATTGCAC             | 499  |
| Consensus             | aattttgtaatgatccatttttgggtgtttattaccacaaaaacaaacaaagttggatggaaagtgaagtcagagtttattctagtgcgaataattgcac        |      |
| Primary infection     | TTTTGAATATGTCCTCAGCCCTTTCTTATGGACCTTGAAGGAAAAACAGGGTAATTTCAAATACTTAGGGAATTTGTGTTTAAAGATATTGATGGTTAT         | 600  |
| Reinfection at 14 dpi | TTTTGAATATGTCCTCAGCCCTTTCTTATGGACCTTGAAGGAAAAACAGGGTAATTTCAAATACTTAGGGAATTTGTGTTTAAAGATATTGATGGTTAT         | 600  |
| Reinfection at 21 dpi | TTTTGAATATGTCCTCAGCCCTTTCTTATGGACCTTGAAGGAAAAACAGGGTAATTTCAAATACTTAGGGAATTTGTGTTTAAAGATATTGATGGTTAT         | 599  |
| Consensus             | ttttgaatattgtctctcagcccttttcttatggaccttgaaggaaaaacagggtaatttcaaaaactcttagggaatttgggtttaagaatattgatggttat    |      |
| Primary infection     | TTTAAATATATCTAAGCACACGCCCTATTAAATTTAGTGGGTGATCTCCCTCAGGGTTTTTCGGCTTTAGAACCATTGGTAGATTGGCCATAGGTATTA         | 700  |
| Reinfection at 14 dpi | TTTAAATATATCTAAGCACACGCCCTATTAAATTTAGTGGGTGATCTCCCTCAGGGTTTTTCGGCTTTAGAACCATTGGTAGATTGGCCATAGGTATTA         | 700  |
| Reinfection at 21 dpi | TTTAAATATATCTAAGCACACGCCCTATTAAATTTAGTGGGTGATCTCCCTCAGGGTTTTTCGGCTTTAGAACCATTGGTAGATTGGCCATAGGTATTA         | 699  |
| Consensus             | tttcaaatatattctaagcacacgccctattaatttagtggtgtatctccctcagggtttttcgggtttagaaccattggtagatttgcgaataggtattta      |      |
| Primary infection     | ACATCCTAGGTTTCAAACTTTACTTGCTTTACATAGAAGTTTATGACTCTGGTGATTTCTTCTCAGGTTGGACAGCTGGTGCAGCTTATTATGT              | 800  |
| Reinfection at 14 dpi | ACATCCTAGGTTTCAAACTTTACTTGCTTTACATAGAAGTTTATGACTCTGGTGATTTCTTCTCAGGTTGGACAGCTGGTGCAGCTTATTATGT              | 800  |
| Reinfection at 21 dpi | ACATCCTAGGTTTCAAACTTTACTTGCTTTACATAGAAGTTTATGACTCTGGTGATTTCTTCTCAGGTTGGACAGCTGGTGCAGCTTATTATGT              | 799  |
| Consensus             | acatacctagggttcaaaacttacttgctttacatagaagttatttgaacttctggtgattctcttccaggttggacagctgggtcgtcagcttattatgt       |      |
| Primary infection     | GGGTTATCTTCAACCTAGGACTTTTCTATTAAATATATAAGAAATGGAACCATTAACAGATGCTGTAGACTGTGCATTTGACCTCTCTCAGAAACAAAG         | 900  |
| Reinfection at 14 dpi | GGGTTATCTTCAACCTAGGACTTTTCTATTAAATATATAAGAAATGGAACCATTAACAGATGCTGTAGACTGTGCATTTGACCTCTCTCAGAAACAAAG         | 900  |
| Reinfection at 21 dpi | GGGTTATCTTCAACCTAGGACTTTTCTATTAAATATATAAGAAATGGAACCATTAACAGATGCTGTAGACTGTGCATTTGACCTCTCTCAGAAACAAAG         | 899  |
| Consensus             | gggttatcttcaacctaggacttttctattaaatataatgaaatggaaccattacagatgctgtagactgtgacattgacctctcttcagaacaaag           |      |
| Primary infection     | TGTACGTTGAAATCCTTCACTGTAGAAAAGGAATCTATCAAACTTCTAATCTTAGAGTCCAAACCAACAGAATCTATTGTTAGATTTCCTAATATTACAA        | 1000 |
| Reinfection at 14 dpi | TGTACGTTGAAATCCTTCACTGTAGAAAAGGAATCTATCAAACTTCTAATCTTAGAGTCCAAACCAACAGAATCTATTGTTAGATTTCCTAATATTACAA        | 1000 |
| Reinfection at 21 dpi | TGTACGTTGAAATCCTTCACTGTAGAAAAGGAATCTATCAAACTTCTAATCTTAGAGTCCAAACCAACAGAATCTATTGTTAGATTTCCTAATATTACAA        | 999  |
| Consensus             | tgtacgttgaatcccttcaactgtagaaaaggaatctatcaaaacttctcaacttttagagtccaaccaacagaaatctattgttagatttctctaattataac    |      |
| Primary infection     | ACITGTGCCCTTTTGGTGAAGTTTTTAACGCCACAGATTGTGCATCTGTTTATGCTTGGAAACGGAAGAGAATCAGCAACTGTGTTGCTGATTATTCTGT        | 1100 |
| Reinfection at 14 dpi | ACITGTGCCCTTTTGGTGAAGTTTTTAACGCCACAGATTGTGCATCTGTTTATGCTTGGAAACGGAAGAGAATCAGCAACTGTGTTGCTGATTATTCTGT        | 1100 |
| Reinfection at 21 dpi | ACITGTGCCCTTTTGGTGAAGTTTTTAACGCCACAGATTGTGCATCTGTTTATGCTTGGAAACGGAAGAGAATCAGCAACTGTGTTGCTGATTATTCTGT        | 1099 |
| Consensus             | acttgtgcccttttgggtgaagtttttaacgccacacagatttgcattctgtttatgcttggaaacaggaagagaatcagcaactggtgtgctgattattctgt    |      |
| Primary infection     | CCATATAAATTCGCGATCATTTTCCACTTTTAAAGTGTTATGGAAGTGTCTCTACTAATTAATGATCTCTGCTTTACTAATGTCTATGAGATTTCATT          | 1200 |
| Reinfection at 14 dpi | CCATATAAATTCGCGATCATTTTCCACTTTTAAAGTGTTATGGAAGTGTCTCTACTAATTAATGATCTCTGCTTTACTAATGTCTATGAGATTTCATT          | 1200 |
| Reinfection at 21 dpi | CCATATAAATTCGCGATCATTTTCCACTTTTAAAGTGTTATGGAAGTGTCTCTACTAATTAATGATCTCTGCTTTACTAATGTCTATGAGATTTCATT          | 1199 |
| Consensus             | cctatataattccgcatcatctttccacttttaagtgatttgagtgctctcctactaaataaataatgatctcgtttacttaagtgtctatgcagatcatctt     |      |
| Primary infection     | GTAATTAGAGTGATGAAGTCAGACAAATCGCTCCAGGCAAACTGGAAGAGTTGCTGATTATAATTATAAATACAGATGATTTCACAGCTGCGTTA             | 1300 |
| Reinfection at 14 dpi | GTAATTAGAGTGATGAAGTCAGACAAATCGCTCCAGGCAAACTGGAAGAGTTGCTGATTATAATTATAAATACAGATGATTTCACAGCTGCGTTA             | 1300 |
| Reinfection at 21 dpi | GTAATTAGAGTGATGAAGTCAGACAAATCGCTCCAGGCAAACTGGAAGAGTTGCTGATTATAATTATAAATACAGATGATTTCACAGCTGCGTTA             | 1299 |
| Consensus             | gtaattagagtgatgaagtcagacaaatcgctccagggcaaaactggaagagttgctgattataattataaataaccagatgattttacaggtcgtgta         |      |
| Primary infection     | TAGCTTGGAAATCTCAACAACTTGTATTTAAGGTTTGGTGGTAATTATAATTACCTGTATAGATTGTTTAGGAAGTCTAATCTCAAACTTTTGGAGAGA         | 1400 |
| Reinfection at 14 dpi | TAGCTTGGAAATCTCAACAACTTGTATTTAAGGTTTGGTGGTAATTATAATTACCTGTATAGATTGTTTAGGAAGTCTAATCTCAAACTTTTGGAGAGA         | 1400 |
| Reinfection at 21 dpi | TAGCTTGGAAATCTCAACAACTTGTATTTAAGGTTTGGTGGTAATTATAATTACCTGTATAGATTGTTTAGGAAGTCTAATCTCAAACTTTTGGAGAGA         | 1399 |
| Consensus             | tagcttgggaattctaacaaactcttgattctaaaggttggtggttaattataattactctgtatagattgttttaggaagtctaatctcaaaccttttgagagaga |      |
| Primary infection     | TATTTCAACTGAATCTATCAGGCCGTTAGCACACCTTGTAATGGTGTGGAAGGTTTAAATGTTTACTTTTCTTACAATCATATGGTTTCCAAACCCACT         | 1500 |
| Reinfection at 14 dpi | TATTTCAACTGAATCTATCAGGCCGTTAGCACACCTTGTAATGGTGTGGAAGGTTTAAATGTTTACTTTTCTTACAATCATATGGTTTCCAAACCCACT         | 1500 |
| Reinfection at 21 dpi | TATTTCAACTGAATCTATCAGGCCGTTAGCACACCTTGTAATGGTGTGGAAGGTTTAAATGTTTACTTTTCTTACAATCATATGGTTTCCAAACCCACT         | 1499 |
| Consensus             | tatttcaactgaaactatcagggcggtagcacaccttgtaatgggttggaaggttttaattgtttacttttcttacaatcatatggtttccaaacccact        |      |
| Primary infection     | AATGGTGTGGTTACCAACCATACAGAGTAGTAGTACTTTCTTTGAACCTTCTACATGCACACCACTGTTTGTGGACCTAAAAAGTCTACTAATTGG            | 1600 |
| Reinfection at 14 dpi | AATGGTGTGGTTACCAACCATACAGAGTAGTAGTACTTTCTTTGAACCTTCTACATGCACACCACTGTTTGTGGACCTAAAAAGTCTACTAATTGG            | 1600 |
| Reinfection at 21 dpi | AATGGTGTGGTTACCAACCATACAGAGTAGTAGTACTTTCTTTGAACCTTCTACATGCACACCACTGTTTGTGGACCTAAAAAGTCTACTAATTGG            | 1599 |
| Consensus             | aatggtgttggttaccacacacacagagtagtagtactttctttgaacttctacatgcaccagcaactggttggagacctaaaaagtcactaatttgg          |      |
| Primary infection     | TTAAAAACAATGTGTCAATTTCAACTTCAATGGTTTAAACAGGCACAGGTGTTCTTACTGAGTCTAACAAAAAGTTTCTGCCCTTTCCAACAATTTGGCAG       | 1700 |
| Reinfection at 14 dpi | TTAAAAACAATGTGTCAATTTCAACTTCAATGGTTTAAACAGGCACAGGTGTTCTTACTGAGTCTAACAAAAAGTTTCTGCCCTTTCCAACAATTTGGCAG       | 1700 |
| Reinfection at 21 dpi | TTAAAAACAATGTGTCAATTTCAACTTCAATGGTTTAAACAGGCACAGGTGTTCTTACTGAGTCTAACAAAAAGTTTCTGCCCTTTCCAACAATTTGGCAG       | 1699 |
| Consensus             | ttaaaaacaatgtgtcaatttcaacttcaatggttttaaaccaggcacaggtgtcttactgagtgctaaacaaagtttctgctttccaacaaatttggcag       |      |
| Primary infection     | AGACATTGCTGACACTACTGATGCTGCTGGTATGATCCACAGACACTTGAGATTCTTGACATTACACCATGTTCTTTTGGTGGTGCAGTGTATTAACACCA       | 1800 |
| Reinfection at 14 dpi | AGACATTGCTGACACTACTGATGCTGCTGGTATGATCCACAGACACTTGAGATTCTTGACATTACACCATGTTCTTTTGGTGGTGCAGTGTATTAACACCA       | 1800 |
| Reinfection at 21 dpi | AGACATTGCTGACACTACTGATGCTGCTGGTATGATCCACAGACACTTGAGATTCTTGACATTACACCATGTTCTTTTGGTGGTGCAGTGTATTAACACCA       | 1799 |
| Consensus             | agacattgctgacactactgatgctgctggtatccacagacacttgagattcttgacattacacacatgtctcttttgggtggtcagtgctgtataacacca      |      |
| Primary infection     | GGAAACAATACTTCTAACCAAGTTGCTGTTCTTTACAGGATGTTAACTGCACAGAGTCCCTGTTGCTATTATGAGTGTGACATCACTTACTCTACTTGGC        | 1900 |
| Reinfection at 14 dpi | GGAAACAATACTTCTAACCAAGTTGCTGTTCTTTACAGGATGTTAACTGCACAGAGTCCCTGTTGCTATTATGAGTGTGACATCACTTACTCTACTTGGC        | 1900 |
| Reinfection at 21 dpi | GGAAACAATACTTCTAACCAAGTTGCTGTTCTTTACAGGATGTTAACTGCACAGAGTCCCTGTTGCTATTATGAGTGTGACATCACTTACTCTACTTGGC        | 1899 |
| Consensus             | ggaaacaatacttctaaccaggttgctgtctttatcaggtatgtaactgcacagaagtcctctgttgctattcatgcagatcaacttactcctacttggc        |      |
| Primary infection     | GTGTTTATCTACAGGTTCTAATGTTTCTTCAACACAGTGCAGGCTGTTTAAATAGGGGCTGAACATGTCAACAACTCATATGAGTGTGACATACCCATTGG       | 2000 |
| Reinfection at 14 dpi | GTGTTTATCTACAGGTTCTAATGTTTCTTCAACACAGTGCAGGCTGTTTAAATAGGGGCTGAACATGTCAACAACTCATATGAGTGTGACATACCCATTGG       | 2000 |
| Reinfection at 21 dpi | GTGTTTATCTACAGGTTCTAATGTTTCTTCAACACAGTGCAGGCTGTTTAAATAGGGGCTGAACATGTCAACAACTCATATGAGTGTGACATACCCATTGG       | 1999 |
| Consensus             | gtgtttattctacaggtttctaagtgttttcaaacacagctgagcgtgtttaaagggcgtgaacatgtcaacaactcatatgagtgtagacataccattgg       |      |
| Primary infection     | TGCAGGTATATGCGCTAGTTATCAGACTCAGACTAATTCCTCC                                                                 | 2045 |
| Reinfection at 14 dpi | TGCAGGTATATGCGCTAGTTATCAGACTCAGACTAATTCCTCC                                                                 | 2043 |
| Reinfection at 21 dpi | TGCAGGTATATGCGCTAGTTATCAGACTCAGACTAATTCCTCC                                                                 | 2043 |
| Consensus             | tcaggttatatgctgtagttatcagactcagactaattctcctc                                                                |      |

**Figure S3:** No difference in the S1 gene sequence from the nasal washes between the

primary infection and reinfection.

**Table S1.** *p*-value among viral loads in various tissues in the primary and secondary infection by SPSS PASW statistical software version 18.0

|     |     | Viral load in nose | Viral load in nasal mucosa | Viral load in lung | Viral load in trachea | Viral load in bulbous olfactorius | Viral load in cerebrum | Viral load in jaw | Viral load in NALF | Viral load in BALF | sgRNA in nose | sgRNA in nasal mucosa |
|-----|-----|--------------------|----------------------------|--------------------|-----------------------|-----------------------------------|------------------------|-------------------|--------------------|--------------------|---------------|-----------------------|
| D0  | B A | 0.000              | 0.000                      | 0.000              |                       |                                   |                        |                   |                    |                    | 0.386         |                       |
|     | C A | 0.000              | 0.000                      | 0.000              |                       |                                   |                        |                   |                    |                    | 0.001         |                       |
|     | B C | 0.360              | 0.000                      | 0.014              |                       |                                   |                        |                   |                    |                    | 0.001         |                       |
| D3  | B A | 0.000              | 0.000                      | 0.000              | 0.000                 | 0.000                             | 0.000                  | 0.081             | 0.000              | 0.000              | 0.019         | 0.155                 |
|     | C A | 0.000              | 0.000                      | 0.000              | 0.000                 | 0.000                             | 0.000                  | 0.005             | 0.000              | 0.000              | 0.010         | 0.007                 |
|     | B C | 0.863              | 0.891                      | 0.001              | 0.003                 | 0.362                             | 0.380                  | 0.061             | 0.066              | 0.473              | 0.592         | 0.054                 |
| D5  | B A | 0.000              | 0.000                      | 0.000              | 0.000                 | 0.000                             | 0.000                  | 0.009             | 0.000              | 0.000              | 0.000         | 0.000                 |
|     | C A | 0.000              | 0.000                      | 0.000              | 0.004                 | 0.000                             | 0.000                  | 0.001             | 0.000              | 0.000              | 0.000         | 0.000                 |
|     | B C | 0.007              | 0.006                      | 0.080              | 0.038                 | 0.236                             | 0.000                  | 0.037             | 0.000              | 1.000              | 0.219         | 0.000                 |
| D7  | B A | 0.000              | 0.000                      | 0.000              | 0.000                 | 0.000                             | 0.000                  | 0.005             | 0.003              | 0.001              | 0.000         | 0.000                 |
|     | C A | 0.000              | 0.000                      | 0.000              | 0.014                 | 0.000                             | 0.001                  | 0.003             | 0.002              | 0.000              | 0.000         | 0.000                 |
|     | B C | 0.006              | 0.698                      | 0.050              | 0.002                 | 0.210                             | 0.279                  | 0.747             | 0.703              | 0.783              | 0.297         | 1.000                 |
| D10 | B A | 0.000              | 0.009                      | 0.000              | 0.001                 | 0.037                             | 0.038                  | 0.043             |                    | 0.037              | 0.558         | 0.000                 |
|     | C A | 0.000              | 0.001                      | 0.000              | 0.061                 | 0.007                             | 0.035                  | 0.023             |                    | 0.004              | 0.063         | 0.000                 |
|     | B C | 0.071              | 0.089                      | 0.015              | 0.010                 | 0.237                             | 0.952                  | 0.646             |                    | 0.113              | 0.027         | 1.000                 |

A Primary infection; B Reinfected at 14 dpi of primary infection; C Reinfected at 21 dpi of primary infection

NALF were nasal pharyngeal larvage fluid, BALF were bronchoalveolar larvage fluid.

**Table S2.** Histology score standards of the lung damage

| Categories            | Score                                                                                                                                                                                   |
|-----------------------|-----------------------------------------------------------------------------------------------------------------------------------------------------------------------------------------|
| Pulmonary parenchymal | 0 none                                                                                                                                                                                  |
|                       | 1 The lung structure was clear, and the alveolar septum was slightly thickened, very few inflammatory cells infiltrate                                                                  |
|                       | 2 Local edema, local alveolar septum thickening, alveolar cells had slightly exfoliated necrosis, a small amount of inflammatory cell infiltration                                      |
|                       | 3 Some alveolar septum was thickened, accompanied by mild parenchymal lesions, a small amount of alveolar cell degeneration necrosis, moderate amount of inflammatory cell infiltration |
|                       | 4 Large area of the alveolar septum was thickened, some substantial lesions, large area of alveolar structure has disappeared, alveolar                                                 |

|                         |                                                                                                                                                                                                                                                                                                                                                                                                                                                                                                                                                                                                                                                                |
|-------------------------|----------------------------------------------------------------------------------------------------------------------------------------------------------------------------------------------------------------------------------------------------------------------------------------------------------------------------------------------------------------------------------------------------------------------------------------------------------------------------------------------------------------------------------------------------------------------------------------------------------------------------------------------------------------|
|                         | <p>cells have degeneration and necrosis, a large number of inflammatory cell infiltration</p> <p>5 Lung structure disappeared with extensive consolidation and diffuse infiltration of inflammatory cells</p>                                                                                                                                                                                                                                                                                                                                                                                                                                                  |
| Bronchus and Bronchiole | <p>0 none</p> <p>1 Local tracheal epithelium was slightly diseased with slight cell abscission</p> <p>2 Part of trachea epithelial cells were shed, and mild amount of exudate was observed in the lumen</p> <p>3 The cells were denaturated and necrotic, part of the mucosa is detached, and a large number of inflammatory exudates and tissue fragments could be seen in the lumen</p> <p>4 The cells were denaturated and necrotic, and a large number of mucosa detached, part of the lumen was blocked</p> <p>5 The cells were denaturated and necrotic, and a large number of the mucosa was detached, A large area or the total lumen was blocked</p> |
| Pulmonary vasculitis    | <p>0 none</p> <p>1 Mild edema and hyperemia, minimal inflammatory cell infiltrated around the lumen</p> <p>2 Vascular edema, local endothelial cells were necrotic, a small number of inflammatory cell infiltration</p> <p>3 Endothelial cells were denaturated and necrotic with vascular wall hyperplasia, inflammatory cell infiltration</p> <p>4 Vascular wall cells were denaturated and necrotic, with lumen stenosis and inflammatory cell infiltration</p> <p>5 Vascular structures were ruptured or many cells were denaturated and necrotic, diffuse infiltration of inflammatory cells</p>                                                         |

**Table S3.** Sequences of primers for real time RT-qPCR detection of mRNA gene expression of host cytokines

| Gene name      | Forward primer (5' to 3') | Reverse Primer (5' to 3') |
|----------------|---------------------------|---------------------------|
| <i>β-actin</i> | ATGGCCAGGTCATCACCATT<br>G | CAGGAAGGAAGGCTGGAAAA<br>G |
| <i>IL-1β</i>   | GTGGACAACAAAGCTCGTG<br>G  | AGCCCGTCAACCTCAAAGAA      |
| <i>IL-6</i>    | TGTCTTCTTGGGACTGCTGC      | CCAAACCTCCGACTTGTTGA      |
| <i>TNF-α</i>   | CACCCACCGTCAAGGATTCA      | TTGGCTGGGCAATGAAGAGT      |
| <i>IFN-α</i>   | AGACTGGGAGTTGCCTGTGA      | GAGGAATCCAGGGCTTTCCAG     |
| <i>IFN-γ</i>   | TGCATCTTGGCTTTGTTGCTC     | TCCCCTCCATTACGACATC       |
| <i>MIP-1α</i>  | GGTCCAAGAGTACGTCGCTG      | GAGTTGTGGAGGTGGCAAGG      |
| <i>RANTES</i>  | TCAGCTTGGTTTGGGAGCAA      | TGAAGTGCTGGTTTCTTGGGT     |

|              |                      |                      |
|--------------|----------------------|----------------------|
| <i>IP-10</i> | TACGTCGGCCTATGGCTACT | TTGGGGACTCTTGTCACTGG |
|--------------|----------------------|----------------------|
